# Supplementary material
Source: Frontiers journal article supplement (https://www.frontiersin.org/articles/226015)
Supplement: Image_1.PDF [file Image_1.PDF]

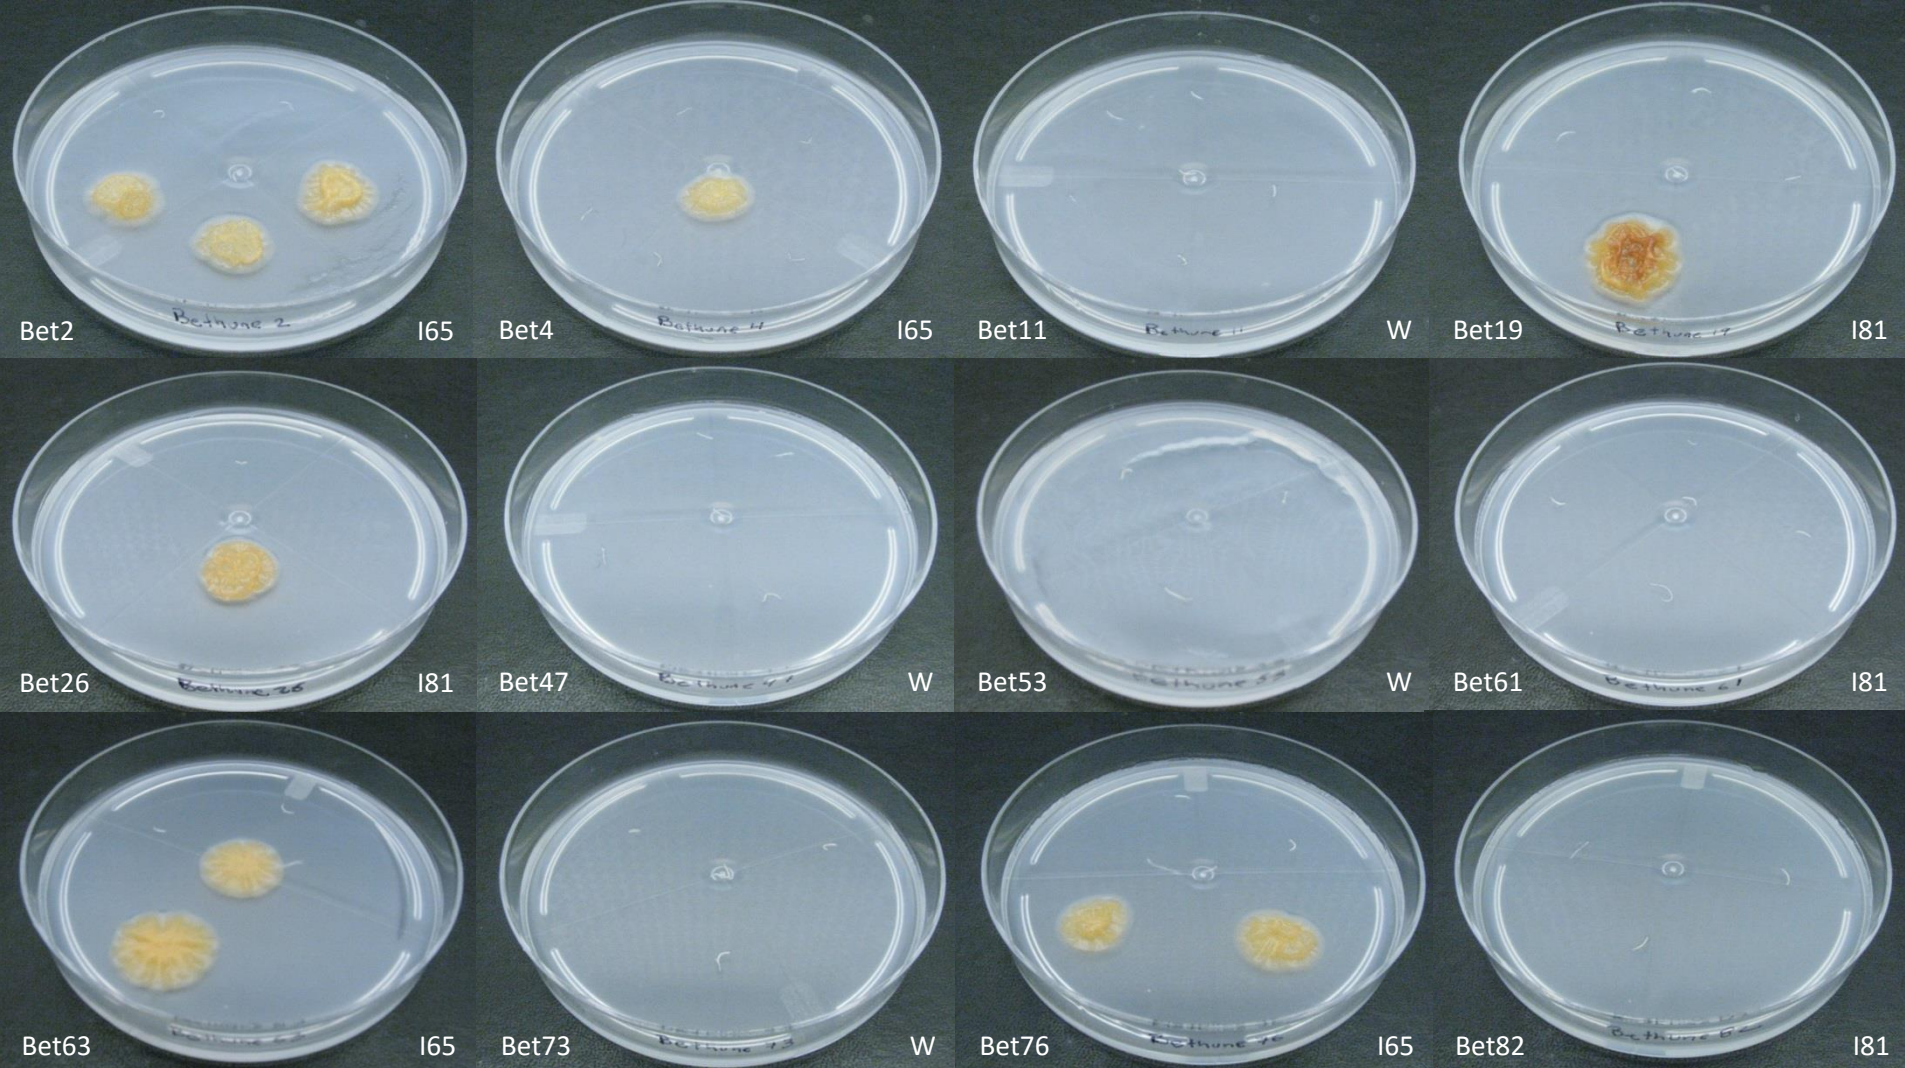

(A)



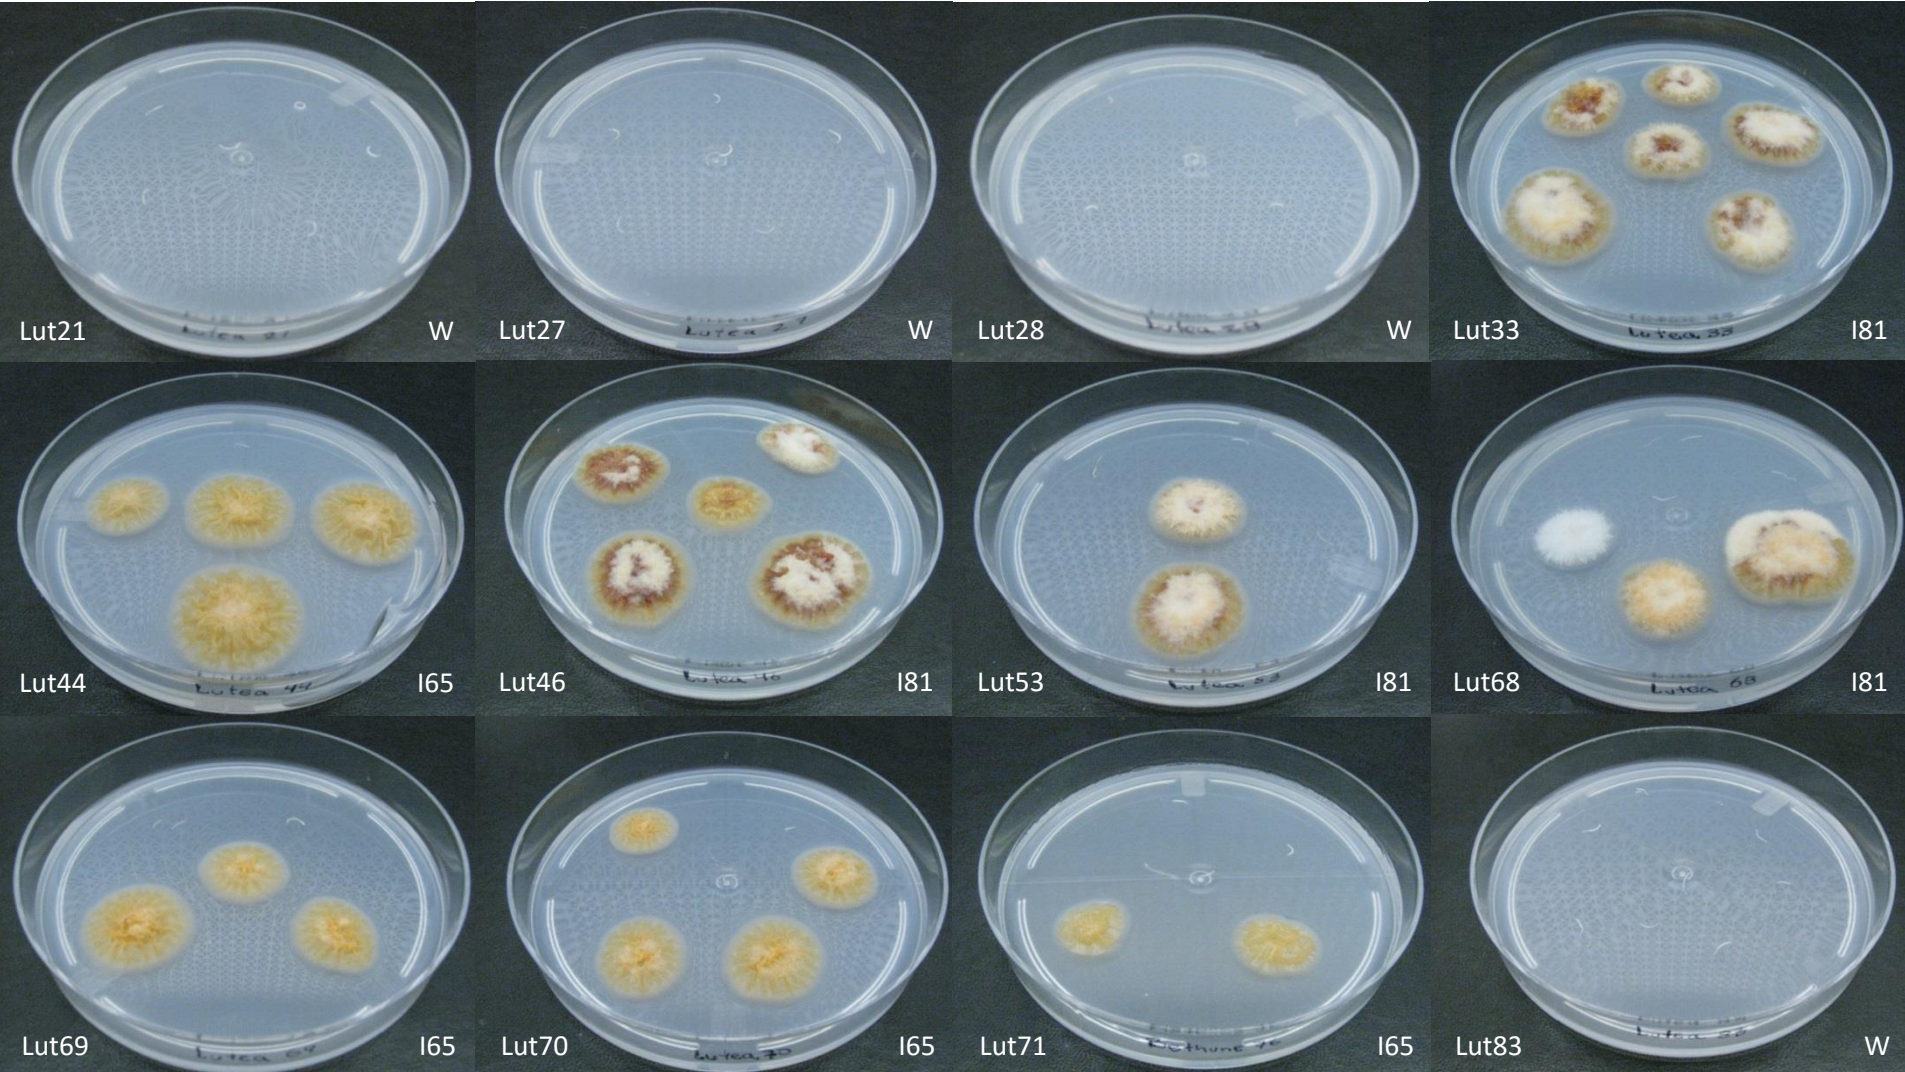

**(B)**



(C)

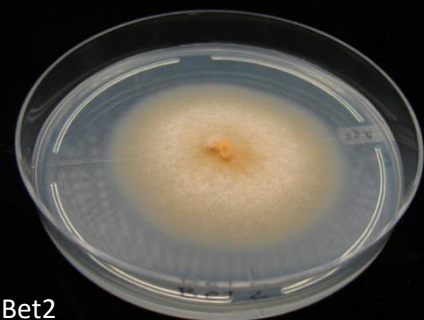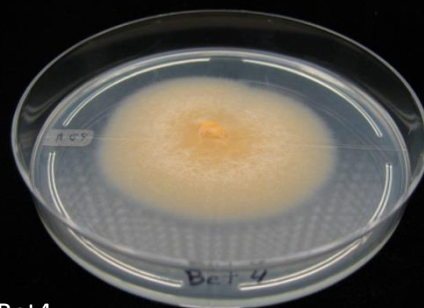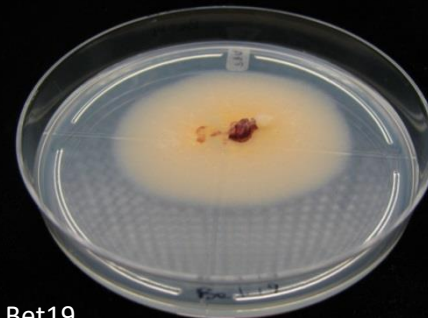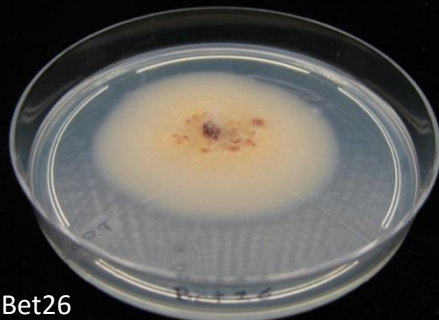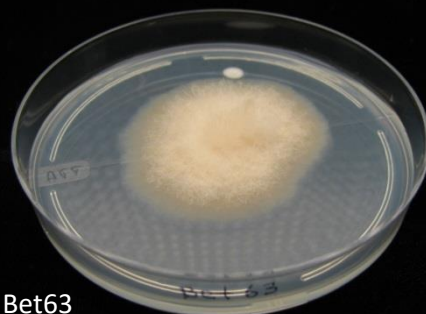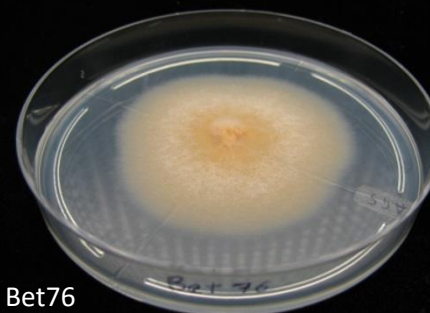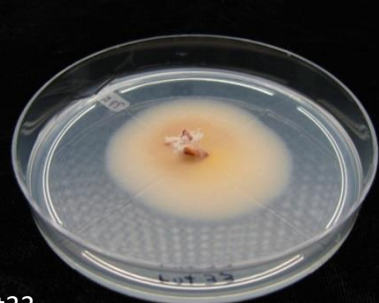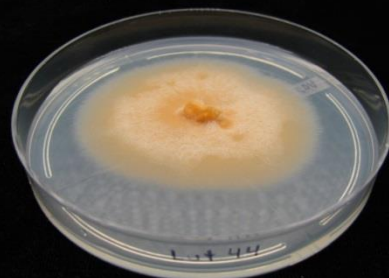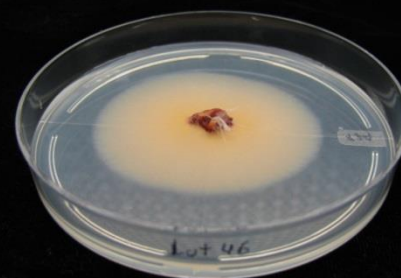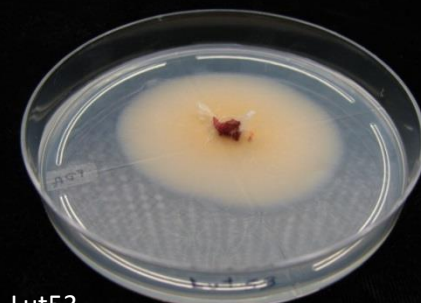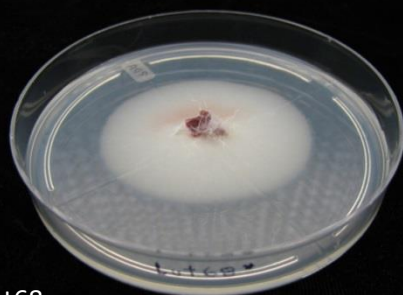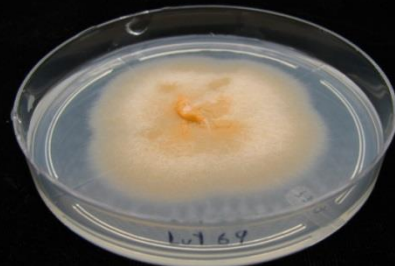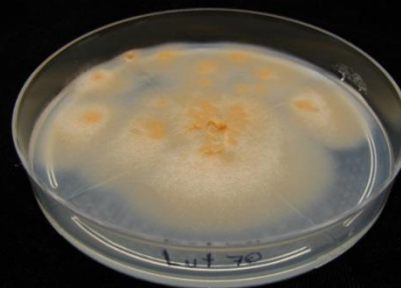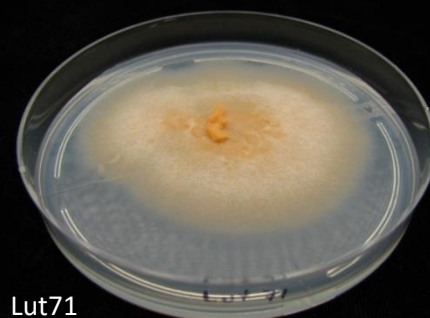

**Figure S1. Reisolation of Foln from surface-sterilized roots.** (A) Komada growth for CDC Bethune plants. (B) Komada growth for Lutea plants. (C) Subculture of fungal isolates from Komada media, grown in PDA. I65 and I81 = fungal isolates, W = water control.
